# Supplementary material
Source: publisher site journal article supplement (https://www.dovepress.com/get_supplementary_file.php?f=317528.docx)
Supplement: Supplementary file 1 [file get_supplementary_file.php]

Clinic-Pathologic Characteristics in AML Patients of Different *IGHD1-20* Expression Among TCGA Cohort.

| Parameters | IGHD1-20 Expression | | P-value |
| --- | --- | --- | --- |
| High Group (n=65) | Low Group (n=65) |
| Median age (years) | 51 (21-78) | 61(21-88) | 0.018 |
| Sex (Female/male) | 31/34 | 29/36 | 0.725 |
| Mdeian WBC | 18(0-116) | 12(1-203) | 0.769 |
| Mdeian BM Blast | 32(0-97) | 41(0-96) | 0.377 |
| Mdeian monocyte | 6（0-59） | 5（0-76） | 0.328 |
| Mdeian hemoglobin | 9（7-12） | 10（0-13） | 0.038 |
| FAB |  |  |  |
| M0 | 2（3.1%） | 10（15.4%） | 0.047 |
| M1 | 13（20.0%） | 17（26.2%） |
| M2 | 14（21.5%） | 18（27.7%） |
| M3 | 10（15.4%） | 4（6.2%） |
| M4 | 17（26.2%） | 10（15.4） |
| M5 | 8（12.3%） | 4（6.2%） |
| M6 | 1（1.5%） | 1（1.5%） |
| M7 | 0（0.0%） | 1（1.5%） |
| Cytogenetics |  |  |  |
| Normal | 23(35.4%) | 38(58.5%) | 0.11 |
| t(15;17) | 7(10.8%) | 4(6.2%) |
| t(8;21) | 6(9.2%) | 1(1.5%) |
| inv(16) | 6(9.2%) | 2(3.1%) |
| 8 | 2(3.1%) | 4(6.2%) |
| del(5q) / 5q- | 0(0.0%) | 1(1.5%) |
| del(7q) / 7q- | 2(3.1%) | 2(3.1%) |
| t(9;11) | 0(0.0%) | 1(1.5%) |
| other | 2(3.1%) | 1(1.5%) |
| Complex | 9(13.8%) | 7(10.8%) |
| NO data | 8(12.3%) | 4(6.2%) |
| karyotype |  |  |  |
| NO data | 1(1.5%) | 1(1.5%) | 0.003 |
| Favorable | 23(35.4%) | 7(10.8%) |
| Intermediate/Normal | 28(43.1%) | 44(67.7%) |
| Poor | 13(20.0%) | 13(20.0%) |

**Supplementary Table 1**

Significantly enriched GO terms of differentially expressed in patients with high-risk scores with adjust p-value < 0.01.

| ONTOLOGY | ID | Description | Count | pvalue | p.adjust | Count |
| --- | --- | --- | --- | --- | --- | --- |
| BP | GO:0006909 | phagocytosis | 141 | 5.32E-38 | 3.26E-34 | 141 |
| BP | GO:0002429 | immune response-activating cell surface receptor signaling pathway | 154 | 5.38E-32 | 1.65E-28 | 154 |
| BP | GO:0050900 | leukocyte migration | 155 | 1.27E-29 | 2.60E-26 | 155 |
| BP | GO:0006956 | complement activation | 81 | 5.06E-29 | 7.76E-26 | 81 |
| BP | GO:0051251 | positive regulation of lymphocyte activation | 116 | 4.35E-27 | 3.81E-24 | 116 |
| CC | GO:0019814 | immunoglobulin complex | 80 | 5.59E-32 | 4.03E-29 | 80 |
| CC | GO:0042571 | immunoglobulin complex, circulating | 44 | 9.64E-23 | 3.47E-20 | 44 |
| CC | GO:0009897 | external side of plasma membrane | 112 | 1.39E-18 | 3.35E-16 | 112 |
| CC | GO:0005743 | mitochondrial inner membrane | 108 | 4.65E-11 | 8.39E-09 | 108 |
| CC | GO:0042611 | MHC protein complex | 17 | 1.12E-10 | 1.61E-08 | 17 |
| MF | GO:0003823 | antigen binding | 86 | 7.15E-37 | 7.79E-34 | 86 |
| MF | GO:0034987 | immunoglobulin receptor binding | 45 | 2.96E-22 | 1.62E-19 | 45 |
| MF | GO:0009055 | electron transfer activity | 37 | 1.36E-08 | 4.93E-06 | 37 |
| MF | GO:0042605 | peptide antigen binding | 16 | 1.27E-07 | 3.47E-05 | 16 |
| MF | GO:0016209 | antioxidant activity | 28 | 7.11E-07 | 0.000155 | 28 |

**Supplementary Table 2**

KEGG pathway enrichment analysis of differentially expressed in patients with high-risk scores

| KEGG Term | Description | Count | pvalue | p.adjust | qvalue |
| --- | --- | --- | --- | --- | --- |
| hsa04640 | Hematopoietic cell lineage | 41 | 8.38E-12 | 2.61E-09 | 2.12E-09 |
| hsa04145 | Phagosome | 45 | 2.17E-07 | 1.35E-05 | 1.09E-05 |
| hsa05166 | Human T-cell leukemia virus 1 infection | 57 | 6.97E-07 | 3.09E-05 | 2.51E-05 |
| hsa04514 | Cell adhesion molecules | 42 | 2.30E-06 | 8.63E-05 | 7.01E-05 |
| hsa04714 | Thermogenesis | 55 | 2.23E-05 | 0.000533 | 0.000433 |
| hsa00190 | Oxidative phosphorylation | 36 | 3.17E-05 | 0.000682 | 0.000554 |
| hsa05169 | Epstein-Barr virus infection | 49 | 3.29E-05 | 0.000682 | 0.000554 |
| hsa04672 | Intestinal immune network for IgA production | 18 | 4.43E-05 | 0.000861 | 0.0007 |
| hsa04612 | Antigen processing and presentation | 24 | 7.42E-05 | 0.001357 | 0.001102 |
| hsa05134 | Legionellosis | 19 | 0.000126 | 0.002067 | 0.001679 |
| hsa04062 | Chemokine signaling pathway | 45 | 0.000162 | 0.002517 | 0.002045 |
| hsa04659 | Th17 cell differentiation | 29 | 0.000177 | 0.00257 | 0.002087 |
| hsa04658 | Th1 and Th2 cell differentiation | 26 | 0.000182 | 0.00257 | 0.002087 |
| hsa05202 | Transcriptional misregulation in cancer | 44 | 0.000324 | 0.004202 | 0.003414 |
| hsa04662 | B cell receptor signaling pathway | 23 | 0.000474 | 0.005456 | 0.004432 |
| hsa03010 | Ribosome | 37 | 0.000611 | 0.006338 | 0.005149 |
| hsa00100 | Steroid biosynthesis | 9 | 0.000674 | 0.00655 | 0.00532 |
| hsa04110 | Cell cycle | 30 | 0.001115 | 0.010507 | 0.008535 |
| hsa04210 | Apoptosis | 32 | 0.001278 | 0.011686 | 0.009493 |
| hsa05163 | Human cytomegalovirus infection | 47 | 0.001758 | 0.015189 | 0.012338 |

**Supplementary Table 3**
